# Supplementary material
Source: publisher figshare collection journal article supplement (https://diabetesjournals.figshare.com/articles/dataset/_/19859881)
Supplement: Supplementary file 1 [file 1]

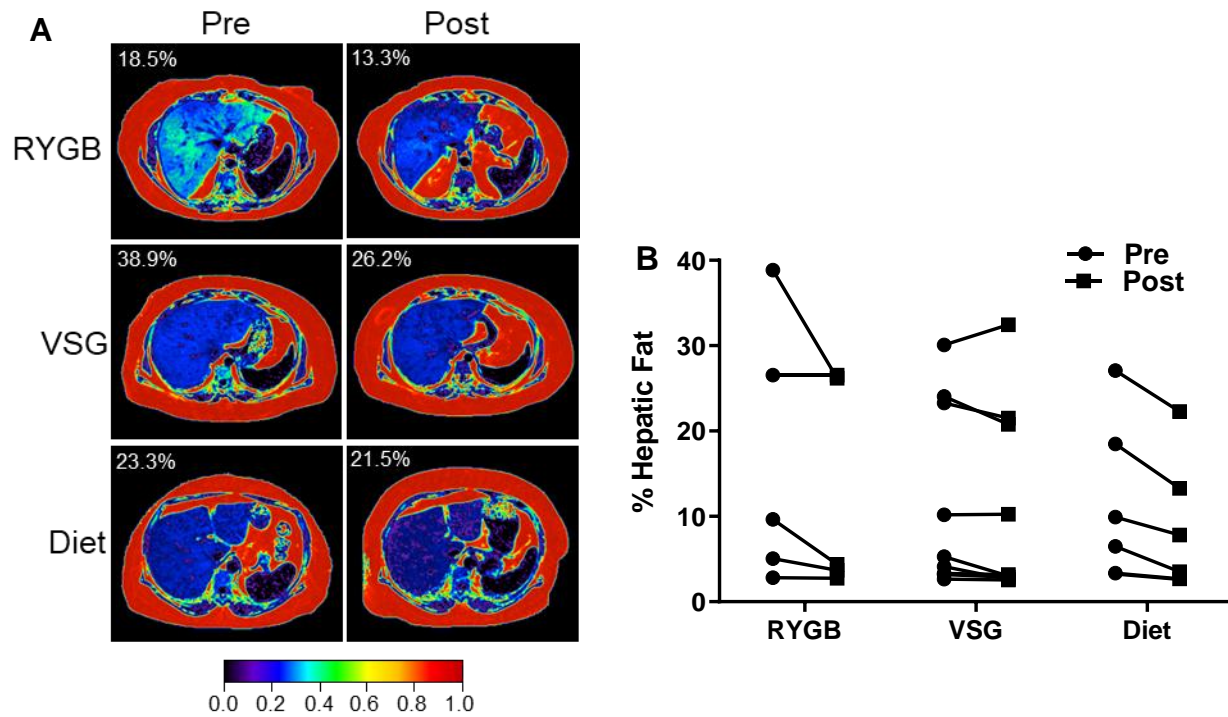

**Supplemental Figure 1.** Measurement of hepatic fat content by MRI. A: Representative fat-water images of hepatic fat at the level of the umbilicus from obese subjects before (Pre) and After (Post) RYGB, VSG, or caloric restriction, with percentage hepatic fat indicated in each panel. The heat map values indicate the fat fraction with 0 representing water and 1 representing adipose. B: Quantitation of percent hepatic fat in 20 participants before and after RYGB (n=5), VSG (n=9), or Diet (n=6). Mean  $\pm$  SD. Group by time interaction (G  $\times$  T)  $P=0.186$ ; Time  $**P=0.0026$
