# Supplementary material
Source: publisher figshare collection journal article supplement (https://diabetesjournals.figshare.com/articles/dataset/_/19859881)
Supplement: Supplementary file 3 [file 1]

## SUPPLEMENTAL TABLES

| Supplemental Table 1. Baseline demographics, anthropometric, and fasting metabolic measurements before/ after Diet, RYGB, or VSG |              |              |              |              |                         |              |                              |              |
|----------------------------------------------------------------------------------------------------------------------------------|--------------|--------------|--------------|--------------|-------------------------|--------------|------------------------------|--------------|
| Variable                                                                                                                         | Diet         |              | RYGB         |              | VSG                     |              | Mixed Effects Model <i>P</i> |              |
|                                                                                                                                  | Pre          | Post         | Pre          | Post         | Pre                     | Post         | Time                         | G X T        |
| <b>N</b>                                                                                                                         | 14           |              | 11           |              | 15                      |              |                              |              |
| <b>Age (yrs.)</b>                                                                                                                | 48.9 ± 12.0  |              | 43.2 ± 9.0   |              | 38.1 ± 9.0 <sup>a</sup> |              |                              |              |
| <b>Sex (Male/Female)</b>                                                                                                         | 2/12         |              | 5/6          |              | 1/14                    |              |                              |              |
| <b>T2D (Yes/No)</b>                                                                                                              | 3/11         |              | 5/6          |              | 4/11                    |              |                              |              |
| <b>Weight (kg)</b>                                                                                                               | 120.1 ± 19.8 | 115.4 ± 18.9 | 132.2 ± 31.2 | 125.2 ± 28.8 | 129.2 ± 23.3            | 122.1 ± 23.2 | <b>&lt;0.0001</b>            | <b>0.013</b> |
| <b>BMI (kg/m<sup>2</sup>)</b>                                                                                                    | 42.8 ± 5.8   | 41.1 ± 5.6   | 45.1 ± 8.6   | 42.5 ± 8.1   | 47.8 ± 7.4              | 45.2 ± 7.4   | <b>&lt;0.0001</b>            | <b>0.034</b> |
| <b>FM (kg)</b>                                                                                                                   | 62.3 ± 14.6  | 61.1 ± 14.1  | 58.8 ± 9.0   | 56.6 ± 9.1   | 70.2 ± 14.9             | 67.6 ± 15.0  | <b>&lt;0.0001</b>            | <b>0.038</b> |
| <b>FFM (kg)</b>                                                                                                                  | 57.7 ± 8.8   | 54.3 ± 8.5   | 64.9 ± 12.3  | 60.8 ± 11.5  | 59.0 ± 10.1             | 54.4 ± 9.9   | <b>&lt;0.0001</b>            | 0.202        |
| <b>Fasting FFA (mmol/L)</b>                                                                                                      | 0.6 ± 0.2    | 0.7 ± 0.1    | 0.6 ± 0.2    | 0.7 ± 0.2    | 0.5 ± 0.2               | 0.6 ± 0.2    | <b>&lt;0.0001</b>            | 0.619        |
| <b>Fasting glucose (mg/dl)</b>                                                                                                   | 115.1 ± 35.3 | 97.6 ± 26.5  | 111.7 ± 31.1 | 95.4 ± 26.8  | 107.3 ± 19.7            | 92.3 ± 16.3  | <b>&lt;0.0001</b>            | 0.902        |
| <b>Fasting insulin (μU/ml)</b>                                                                                                   | 19.7 ± 6.6   | 10.6 ± 3.6   | 29.0 ± 21.6  | 13.6 ± 8.7   | 24.9 ± 14.0             | 14.7 ± 10.7  | <b>&lt;0.0001</b>            | 0.404        |
| <b>EGP basal (mg·kg<sup>-1</sup>·min<sup>-1</sup>)</b>                                                                           | 1.4 ± 0.3    | 1.2 ± 0.3    | 1.4 ± 0.4    | 1.2 ± 0.3    | 1.3 ± 0.3               | 1.0 ± 0.2    | <b>&lt;0.0001</b>            | 0.766        |
| <b>EGP clamp (mg·kg<sup>-1</sup>·min<sup>-1</sup>)</b>                                                                           | 0.42 ± 0.37  | 0.27 ± 0.34  | 0.23 ± 0.22  | 0.15 ± 0.14  | 0.25 ± 0.25             | 0.18 ± 0.27  | <b>0.049</b>                 | 0.753        |
| <b>Rd (mg·kg<sup>-1</sup>·min<sup>-1</sup>)</b>                                                                                  | 3.7 ± 1.7    | 4.1 ± 1.4    | 2.6 ± 1.5    | 3.2 ± 1.3    | 3.3 ± 1.9               | 2.9 ± 0.9    | 0.249                        | 0.064        |
| <b>Rd/I (mg·kg<sup>-1</sup>·min<sup>-1</sup>·μUml<sup>-1</sup>)</b>                                                              | 19.6 ± 10.1  | 24.9 ± 9.7   | 14.9 ± 8.9   | 20.5 ± 8.2   | 17.9 ± 10.4             | 17.3 ± 6.5   | <b>0.011</b>                 | 0.087        |
| <b>Rd/I (mg·kgFFM<sup>-1</sup>·min<sup>-1</sup>·μUml<sup>-1</sup>)</b>                                                           | 0.33 ± 0.20  | 0.45 ± 0.23  | 0.25 ± 0.16  | 0.35 ± 0.18  | 0.32 ± 0.20             | 0.33 ± 0.13  | <b>0.003</b>                 | 0.120        |
| <b>Rd (mg·min<sup>-1</sup>·μUml<sup>-1</sup>)</b>                                                                                | 40.8 ± 21.3  | 53.8 ± 24.2  | 30.4 ± 19.0  | 40.8 ± 18.8  | 39.1 ± 23.3             | 38.5 ± 13.4  | <b>0.017</b>                 | 0.133        |
| <b>Insulin clamp (μU/ml)</b>                                                                                                     | 193.3 ± 28.0 | 170.2 ± 33.3 | 189.8 ± 47.2 | 160.8 ± 19.2 | 194.9 ± 43.6            | 176.4 ± 33.8 | <b>0.0004</b>                | 0.780        |
| <b>MCR-I (ml·min<sup>-1</sup>·m<sup>-2</sup>)</b>                                                                                | 423.1 ± 69.2 | 487.2 ± 98.4 | 443.2 ± 97.9 | 503.8 ± 58.2 | 427.9 ± 69.2            | 487.2 ± 98.4 | <b>0.001</b>                 | 0.794        |

Data are mean ± SD for n=14 Diet (13 for EGP basal and clamp, M, M/I, Insulin Clamp, and MCRI), n = 11 RYGB (10 for FM and FFM), and n=15 VSG. *P* value listed is for the group (Diet or RYGB) by time (Pre or Post) interaction effect (GxT) or the overall effect of time (T). BMI, body mass index; FM, fat mass; FFM, fat-free mass; FFA, free fatty acids; EGP, endogenous glucose production; M, insulin-stimulated glucose disposal; M/I, insulin-stimulated glucose disposal divided by Insulin clamp, MCR-I, metabolic clearance rate of insulin.

**Supplemental Table 2. Plasma hormone levels before and after Diet or RYGB**

| Variable                          | Diet          |               | RYGB          |               | VSG             |               | Mixed Effects Model <i>P</i> |              |
|-----------------------------------|---------------|---------------|---------------|---------------|-----------------|---------------|------------------------------|--------------|
|                                   | Pre           | Post          | Pre           | Post          | Pre             | Post          | Time                         | G X T        |
| <b>Leptin (pg/ml)</b>             | 38668 ± 5680  | 31281 ± 3917  | 27501 ± 3720  | 15682 ± 2636  | 42854.9 ± 22169 | 27147 ± 13423 | <b>&lt;0.001</b>             | 0.333        |
| <b>Adiponectin (pg/ml)</b>        | 31350 ± 3520  | 28786 ± 3660  | 29072 ± 5878  | 27850 ± 4826  | 33086 ± 23240   | 29663 ± 17301 | 0.085                        | 0.809        |
| <b>MCP-1 (pg/ml)</b>              | 103.8 ± 7.1   | 108.6 ± 6.1   | 111.9 ± 9.0   | 109.3 ± 15.4  | 92.6 ± 33.7     | 98.2 ± 35.6   | 0.572                        | 0.744        |
| <b>PAI-1 (pg/ml)</b>              | 78.6 ± 10     | 71.0 ± 6.7    | 86.2 ± 17.6   | 82.2 ± 32.0   | 121.5 ± 174.1   | 65.7 ± 38.5   | 0.359                        | 0.359        |
| <b>IL-8 (pg/ml)</b>               | 3.7 ± 0.3     | 4.3 ± 0.4     | 5.1 ± 1.1     | 7.3 ± 1.1     | 3.4 ± 1.4       | 4.2 ± 1.7     | <b>&lt;0.001</b>             | 0.086        |
| <b>IL-6 (pg/ml)</b>               | 3.1 ± 0.5     | 3.8 ± 0.6     | 9.6 ± 5.2     | 6.3 ± 2.0     | 9.6 ± 16.5      | 6.3 ± 6.3     | 0.605                        | 0.478        |
| <b>Resistin (pg/ml)</b>           | 80.8 ± 3.9    | 85.7 ± 5.2    | 71.9 ± 8.2    | 87.7 ± 11.7   | 106.3 ± 85.0    | 91.9 ± 23.5   | 0.798                        | 0.308        |
| <b>TNFα (pg/ml)</b>               | 2.4 ± 0.2     | 2.9 ± 0.3     | 3.0 ± 0.3     | 4.3 ± 0.9     | 2.5 ± 1.6       | 2.9 ± 1.7     | <b>0.006</b>                 | 0.279        |
| <b>IL-1β (pg/ml)</b>              | 1.5 ± 0.6     | 1.1 ± 0.3     | 2.3 ± 0.7     | 3.9 ± 2.5     | 2.6 ± 4.3       | 1.2 ± 1.4     | 0.923                        | 0.260        |
| <b>Desacyl ghrelin (pg/ml)</b>    | 20.2 ± 3.1    | 24.3 ± 4.8    | 23.3 ± 3.9    | 26.7 ± 7.1    | 55.4 ± 32.2     | 8.5 ± 5.4     | 0.303                        | <b>0.004</b> |
| <b>Acyl-ghrelin (pg/ml)</b>       | 65.3 ± 13.6   | 51.4 ± 7.1    | 43.5 ± 8.9    | 13.1 ± 2.9    | 43.5 ± 29.5     | 13.1 ± 9.5    | <b>&lt;0.001</b>             | <b>0.025</b> |
| <b>Acyl/Desacyl-ghrelin ratio</b> | 4.0 ± 0.9     | 3.3 ± 0.7     | 2.2 ± 0.4     | 0.7 ± 0.2     | 1.8 ± 0.9       | 0.6 ± 0.4     | <b>0.001</b>                 | 0.614        |
| <b>FGF-19 (pg/ml)</b>             | 76.6 ± 15.9   | 99.0 ± 15.4   | 83.7 ± 10.1   | 106.6 ± 26.0  | 124.6 ± 134.2   | 94.4 ± 48.9   | 0.727                        | 0.197        |
| <b>FGF-21 (pg/ml)</b>             | 428.1 ± 285.3 | 324.1 ± 249.7 | 300.6 ± 277.7 | 425.0 ± 465.1 | 345.6 ± 341.4   | 363.9 ± 435   | 0743                         | 0.084        |

Data are expressed as mean ± SD (n=14 Diet, n=11 RYGB, and n=15 VSG). GxT, group by time interaction.

**Supplemental Table 3. Adipokine levels in subcutaneous adipose tissue interstitial fluid before and after Diet or RYGB**

| Variable                   | Diet          |              | RYGB          |               | VSG            |                 | Mixed Effects Model <i>P</i> |       |
|----------------------------|---------------|--------------|---------------|---------------|----------------|-----------------|------------------------------|-------|
|                            | Pre           | Post         | Pre           | Post          | Pre            | Post            | Time                         | G X T |
| <b>Leptin (pg/ml)</b>      | 2517 ± 543    | 1520 ± 484   | 2547 ± 737    | 857 ± 382     | 3012 ± 766     | 1397 ± 396      | <b>0.008</b>                 | 0.819 |
| <b>Adiponectin (pg/ml)</b> | 4304 ± 2108   | 632.1 ± 2323 | 2467 ± 1016   | 464 ± 235     | 2154 ± 1443    | 283 ± 104       | <b>0.022</b>                 | 0.712 |
| <b>MCP-1 (pg/ml)</b>       | 2680 ± 683    | 3131 ± 891   | 2488 ± 838    | 2342 ± 883    | 1639.2 ± 428.5 | 2852.6 ± 544.8  | 0.410                        | 0.664 |
| <b>PAI-1 (pg/ml)</b>       | 151.5 ± 45.4  | 83 ± 24.2    | 133.6 ± 37.6  | 65.5 ± 20.1   | 137.4 ± 26.4   | 66.4 ± 11.8     | <b>0.002</b>                 | 0.998 |
| <b>IL-8 (pg/ml)</b>        | 63.8 ± 16.2   | 63.0 ± 14.1  | 62.7 ± 21.0   | 50.7 ± 16.1   | 42.2 ± 14.7    | 63.0 ± 14.2     | 0.903                        | 0.677 |
| <b>IL-6 (pg/ml)</b>        | 530.8 ± 167.2 | 308.6 ± 96.7 | 380.4 ± 110.1 | 372.0 ± 127.4 | 297.3 ± 69.9   | 366.7 ± 81.1    | 0.520                        | 0.281 |
| <b>Resistin (pg/ml)</b>    | 6681 ± 4160   | 2042 ± 544   | 2525 ± 619    | 2208 ± 1106   | 2407.9 ± 544.6 | 3848.4 ± 1120.9 | 0.448                        | 0.204 |

Data are expressed as mean ± SEM (n=11 Diet, n=7 RYGB, and n=13 VSG). GxT, group by time interaction.
